# Supplementary material for: In Vitro Infection Dynamics of Wuxiang Virus in Different Cell Lines
Source: MDPI journal article supplement (doi:10.3390/v14112383), 2022-10-28
Supplement: s1 [file s1]

Supplemental Table S1. Primers for amplifying the ORF of M and L fragments of SXYQ1872-1.

|        | Target<br>sequence | Primer         | Sequence (5'-3')              |
|--------|--------------------|----------------|-------------------------------|
| WUXV-M | M-1                | M1_F_1-23      | GCATGCATGTTTGAAATAATAGTAGTACT |
|        |                    | M1_R_1082-1106 | TGGGAATTGAAGAATGGGTATCTGT     |
|        | M-2                | M2_F_126-150   | GTTCTTTTGGATAGAGAGTTACTGG     |
|        |                    | M2_R_1231-1253 | CCTCTGGGACACTTATATGCCAT       |
|        | M-3                | M3_F_1167-1192 | GACATTCTGTGATAGTRCAAAGATGT    |
|        |                    | M3_R_2127-2151 | GTGCACCTTATAATGTGAGCTAACT     |
|        | M-4                | M4_F_2078-2098 | GATCAGTRGGAGGTGATGTGG         |
|        |                    | M4_R_3034-3056 | TCAACACAGCTGAACACCTCTAT       |
|        | M-5                | M5_F_2897-2921 | CAGGAATGACAAAYAACACTGTGAT     |
|        |                    | M5_R_3970-3993 | ATAGCCWATTATGATGCCAGCTGT      |
|        | M-6                | M6_F_3867-3888 | GACACARGCTGCAAAGTCAATA        |
|        |                    | M6_R_4283-4301 | TGACACAAAGACCGGTGCATAA        |
| WUXV-L | L-1                | L1_F_1-19      | ATGAATTCCATAATAGAGC           |
|        |                    | L1_R_1029-1054 | AGTCTCCTTGGATACTTAGATCTGAT    |
|        | L-2                | L2_F_142-163   | GTGGATAGAGAGCACTTTGACG        |
|        |                    | L2_R_1283-1307 | CTCTGATCTCTTGACTCTTTAACGT     |
|        | L-3                | L3_F_1217-1242 | TTTAGAAGAGTCCACCTATATTGCC     |
|        |                    | L3_R_2191-2215 | GATTAAACATGCCCATCCATGAGAT     |
|        | L-4                | L4_F_2099-2121 | CAGAGTTGCAGGTCCTAATCATG       |
|        |                    | L4_R_3038-3061 | GTATGATCATTGGGTGCCATCTAG      |
|        | L-5                | L5_F_2889-2910 | AATGAGAATTCCTGAGAGCCAC        |
|        |                    | L5_R_3962-3984 | AAATTCCTCCTCATCACTACGCA       |
|        | L-6                | L6_F_3900-3921 | AATGCAGTGACCAGGACAGAT         |
|        |                    | L6_R_4886-1908 | CTTTATAAGTTCTGCCCACATGC       |
|        | L-7                | L7_F_4795-4816 | GGTCTAAGCAAAGTGTCTCAGTCG      |
|        |                    | L7_R_5787-5808 | AGTCTCAGTGCAGGTCTTCAC         |
|        | L-8                | L8_F_5562-5586 | GAACATATTGTCATACACAGCAGGT     |
|        |                    | L8_R_6250-6273 | TCAGATGAAACCTTCAGAGTCACT      |

Supplemental Table S2. Different amino acid sites of M segment

| position   | 11   | 13   | 18   | 37   | 42   | 44  | 95  | 107 | 118 | 150  | 162  |
|------------|------|------|------|------|------|-----|-----|-----|-----|------|------|
| SXWX1813-2 | I    | E    | M    | D    | N    | L   | K   | K   | T   | T    | N    |
| SXYQ1872-1 | L    | G    | T    | G    | D    | S   | R   | E   | I   | A    | S    |
|            |      |      |      |      |      |     |     |     |     |      |      |
| position   | 172  | 177  | 227  | 257  | 269  | 406 | 517 | 548 | 703 | 1003 | 1066 |
| SXWX1813-2 | A    | V    | T    | M    | P    | I   | I   | V   | A   | V    | I    |
| SXYQ1872-1 | P    | I    | A    | I    | S    | T   | T   | I   | T   | I    | M    |
|            |      |      |      |      |      |     |     |     |     |      |      |
| position   | 1081 | 1101 | 1168 | 1169 | 1184 |     |     |     |     |      |      |
| SXWX1813-2 | R    | V    | I    | I    | M    |     |     |     |     |      |      |
| SXYQ1872-1 | K    | I    | V    | V    | V    |     |     |     |     |      |      |

Supplemental Table S3. Different amino acid sites of L segment

| position   | 101 | 193 | 290 | 576 | 769 | 1161 | 1414 | 1597 | 1549 | 1594 | 1878 |
|------------|-----|-----|-----|-----|-----|------|------|------|------|------|------|
| SXWX1813-2 | R   | I   | V   | T   | V   | G    | V    | A    | I    | I    | S    |
| SXYQ1872-1 | K   | V   | I   | M   | I   | D    | I    | V    | V    | T    | T    |

Supplemental Table S4. Information about primers and probe sequences of qRT-PCR for WUXV detection

| Primers and Probe | Sequence (5'~3')                     | Position* |
|-------------------|--------------------------------------|-----------|
| WUXV_S-F          | TTGGCAACAAGAGCCTTCAC                 | 1346-1365 |
| WUXV_S-R          | ACAAGCCAAAGAAGATGCAAGA               | 1394-1415 |
| WUXV_S-Probe      | Cy5-TCCTTGGCACCCCTCTGGAGACATCCT-BHQ2 | 1367-1392 |

Note: \*The primers and probe locations in the genome were based on the S gene sequence of SXYQ1872-1 WUXV strain (GenBank Access No.: MT786487.1).
